# Supplementary material
Source: Royal Society of Chemistry journal article supplement (doi:10.1039/b108408a), 2001-11-15
Supplement: b108408a.doc [file b108408a.doc]

**Supplementary Information: B108408A**

**A new, highly fluorescent terpyridine which responds selectively to zinc ions with a large red-shift in emission**

Wendy Goodall and J.A. Gareth Williams

**1. Details of synthetic procedures and characterisation**

**Scheme**

*4-Bromo-N,N-diphenylaniline*

Diphenylamine (1.86 g, 11 mol), 4-bromoiodobenzene (3.11 g, 11 mol), 1,10-phenanthroline† (72 mg, 0.4 mmol), copper(I) chloride (40 mg, 0.4 mmol) and potassium hyrdoxide flakes (4.83 g, 8.6 mmol) were added to a mixture of xylene (10 mL) and toluene (5 mL) in a round-bottom flask equipped with a Dean-Stark trap and reflux condenser. The apparatus was purged with nitrogen gas and then heated rapidly to rigorous reflux at a temperature sufficient to ensure condensation beyond the trap. After refluxing for 48 h, the reaction mixture was cooled to 75 ˚C and added to a mixture of toluene (50 mL) and water (50 mL). The organic phase was separated, washed with a further portion of water (100 mL) and then decolourised by refluxing briefly with aluminium oxide (4 g). Filtration of the hot solution, followed by removal of the solvent under reduced pressure led to a brown oil, which was purified by column chromatography on silica, (gradient elution, from hexane to 74% hexane / 26% toluene), leading to a colourless solid (1.48 g, 41%). Spectroscopic data were consistent with those reported previously for this compound prepared by bromination of triphenylamine: S.C. Suh, M.C. Suh and S.C. Chim, *Macromol. Chem. Phys.*, 1999, **200**, 1991.

*4-(neopentylglycolatoboron)-N,N-diphenylaniline*

A Schlenk tube charged with bis(neopentylglycolato)diboron (366 mg, 1.62 mmol), potassium acetate (454 mg, 4.62 mmol) and Pd(dppf)Cl2 (39 mg, 0.05 mol), was evacuated and back-filled with nitrogen, and dry, degassed DMSO (10 mL) added, followed by 4-bromo-N,N-diphenylaniline (500 mg, 1.54 mmol). The mixture was heated under nitrogen at 80˚C for 5.5 h, then diluted with toluene (100 mL) and the solution washed thoroughly with water (5 x 100 mL) and dried over magnesium sulfate. Removal of solvent under reduced pressure led to the required compound as an off-white solid (500 mg, 93%). H (300 MHz, CDCl3): 7.69 (2H, d, *J* 6.6, H *ortho* to B), 7.27 (4H, t, apparent *J* 7.5, *meta* H of pendent Ph), 7.13 (4H, d, *J* 7.5, *ortho* H of pendent Ph), 7.06 (2H, d, *J* 6.6, H *meta* to B), 7.04 (2H, t, *J* 5.1, *para* H of pendent Ph), 3.77 ( 4H, s, CH2), 1.04 (6H, s, CH3); m/z (ES+): 358 (100%, M+H+).

*4'-(4-N,N-Diphenylaminophenyl)-2,2':6',2"-terpyridine: ligand L1*

A solution of 4'-bromoterpyridine‡ (406 mg, 1.30 mmol) and 4-(neopentylglycolatoboron)-N,N-diphenylaniline (512 mg, 1.43 mmol) in dry dimethoxyethane (7 mL) was degassed, and Pd(PPh3)4 (76 mg, 0.065 mmol) was added under nitrogen, followed by sodium carbonate (344 mg, 3.25 mmol, dissolved in 1.5 mL of water and degassed prior to addition). The mixture was stirred vigorously at room temperature for 1 h, and then heated at 80˚C for 24 h. The solvent was removed under reduced pressure and the residue partitioned between dichloromethane and water (25 mL of each). The organic phase was separated, washed with sodium hydroxide solution (0.1 M, 2 x 25 mL) and dried over anhydrous magnesium sulfate. Removal of the solvent under reduced pressure led to the crude product, shown by 1H NMR spectroscopy to be contaminated by a small amount of triphenylphosphine. Purification was accomplished readily by recrystallisation from ethanol (410 mg, 66%). H* (300 MHz, CDCl3): 8.63 (2H, d, *J* 4.0, H6), 8.62 (2H, s, H3'), 8.58 (2H, d, *J* 8.1, H3), 7.77 (2H, td, *3J* 8, *4J* 2, H4), 7.70 (2H, d, *J* 8.0, Ho), 7.24 (6H, m, H5 and *ortho* H of pendent phenyls), 7.19 (2H, J 8.0, Hm), 7.08 (4H, dd, *3J* 7.8, 4.8, *meta* H of pendent phenyls), 6.98 (2H, t, *J* 7.8, *para* H of pendent Ph); C* (62.9 MHz, CDCl3, assigned using 1H-13C COSY): 156.3, 155.8, 149.7, 149.2 (quaternary carbons), 148.7 (C6), 147.4 (quaternary), 136.8 (C4), 131.8 (quaternary), 129.4 (Cm), 128.0 (Co), 124.8 (pendent Ph), 123.8 (C5), 123.3, 123.1 (pendent Ph), 121.4 (C3), 118.3 (C3'). m/z (DCI): 477 (100%, M+H+).

* Ho (Co) and Hm (Cm) designate protons (carbons) of the bridging phenyl ring *ortho* and *meta* to the amino nitrogen atom respectively.

*4'-(4-N,N-Dimethylaminophenyl)-2,2':6',2"-terpyridine: ligand L2*

A procedure similar to that described above for L1 was employed, using the following reagents: 4-(dimethylamino)benzene boronic acid (348 mg, 2.11 mmol), 4'-triflate-terpyridine (700 mg, 1.92 mmol), Pd(PPh3)4 (113 mg, 0.10 mmol) and sodium carbonate (509 mg, 4.8 mmol, dissolved in 1.6 mL water). In this case, the solvent used was THF (14 mL). Analysis by TLC revealed that the reaction had gone to completion after 15 h, and the mixture was worked up as above. In contrast to L1, recrystallisation from ethanol failed to remove all traces of triphenylphosphine, but the product could be purified by dissolution in aqueous hydrochloric acid (1M, 6 mL), washing with dichloromethane (3 x 5 mL), basicification with sodium hydroxide pellets, and re-extraction into dichloromethane. Drying over anhydrous potassium carbonate and removal of solvent under reduced pressure gave ligand L2 (480 mg, 65%). The spectroscopic data were consistent with those described previously, whilst the isolated yield compares very favourably to the 17% yield reported for preparation by the conventional route, where a laborious purification procedure is necessary.6

† The addition of the copper(I)-binding ligand 1,10-phenanthroline to the conventional Ullmann copper catalysts allows the condensation reaction to proceed under much milder conditions: H.B. Goodbrand and N.-X. Hu, *J. Org. Chem.*, 1999, **64**, 670.

‡ 4'-Bromoterpyridine may be prepared from commercially available 2,6-bis(2-pyridyl)-4(1H)-pyridone upon treatment with POBr3 / PBr3 (see, for example, B. Whittle, S.R. Batten, J.C. Jeffery, L.H. Rees and M.D. Ward, *J. Chem. Soc., Dalton Trans.*, 1996, 4249). We have found that the yield and ease of this conversion is improved by first converting the pyridone to the triflate (as described by K.T. Potts and D. Konwar, *J. Org. Chem.*, 1991, **56**, 4815). Treatment of the latter with HBr / AcOH at 110˚C for 4 h, followed by addition to ice/water, neutralisation and extraction into dichloromethane, leads to the bromo compound in excellent yield (typically >90%). An alternative and very different synthetic pathway has also been reported, via a 1,2,4-triazine acting as a heterodiene in a [4+2] cycloaddition reaction (J. Sauer, D.K. Heldmann and G.R. Pabst, *Eur. J. Org. Chem.*, 1999, 313).

**2. pH dependence of fluorescence of L1 and L2**

*Effect of pH on the fluorescence intensity of L1 in ethanol.*

Excitation at the isosbestic point (387 nm), bandpasses 2.5 nm, trifluoroacetic acid and tetramethylammonium hydroxide were used as the acid and base respectively. I = 0.1 M Me4NPF6

*Effect of pH on the fluorescence intensity of L2 in ethanol.*

Excitation at the isosbestic point (380 nm) with bandpasses of 4.0 nm. Acid, base and ionic strength as above.

**3. Effect of zinc(II) ions.**

*Increase in fluorescence intensity at 620 nm for ligand L1 in ethanol as a function of added zinc triflate at 293 K; ex = 415 nm.* Under the conditions employed, the concentration of ligand-bound zinc is not negligible compared to the total zinc concentration, and the observed data (open circles) were analysed by non-linear least squares fitting (solid line) to the full equation below, leading to an apparent 2:1 association constant of 4.3 ± 0.6 x 109 mol-2 dm6. The sample data shown were obtained using a ligand concentration of 6.7 x 10-6 mol dm-3.

where f is the observed change in fluorescence intensity at a given concentration, [Zn2+]tot, of added zinc, fmax is the hypothetical f that would be observed if the ligand were fully complexed, and [L]0 is the concentration of ligand employed.
